# Supplementary material for: “The most culturally safe training I’ve ever had”: the co-design of a culturally safe Managing hepatitis B training course with and for the Aboriginal health workforce of the Northern Territory of Australia
Source: Springer Nature journal article supplement (doi:10.1186/s12913-023-09902-w), 2023-08-31
Supplement: MOESM2 [file 25986906]

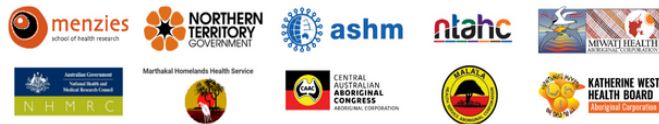

## Hep B PAST Partnership Members and Individuals

### Partner Organisations

|                                                    |
|----------------------------------------------------|
| Menzies School of Health Research                  |
| Northern Territory Government, NT Health           |
| ASHM                                               |
| Katherine West Health Board Aboriginal Corporation |
| Miwatj Health Aboriginal Corporation               |
| NT AIDS and Hepatitis Council                      |
| Mala'la Health Service Aboriginal Corporation      |
| Marthakal Homelands Health Service                 |
| Central Australian Aboriginal Congress             |

### Associate Partner Organisations

|                                                                        |
|------------------------------------------------------------------------|
| WHO Collaborating Centre for Viral Hepatitis, VIDRL, Doherty Institute |
| VIDRL                                                                  |
| Hepatitis Australia                                                    |

### Investigators and Contributors

|                         |                     |
|-------------------------|---------------------|
| Adrian Miller           | Letisha Parker      |
| Amanda Dhagapan         | Levinia Crooks^     |
| Anna Deng               | Libby Coombes       |
| Anna Ralph              | Linda Bunn          |
| Anngie Everitt          | Lorraine Johns      |
| Ashleigh Qama           | Lou Sanderson       |
| Barbara De Graaff       | Lucie Perriseel     |
| Belinda Greenwood-Smith | Manoji Gunathilake  |
| Benjamin Cowie          | Marco Briceno       |
| Brianna Summers         | Margaret Littlejohn |
| Carrie Fowler           | Maria Scarlett      |
| Catherine Blacker       | Marilou Capati      |
| Catherine Gargan        | Matthew Maddison    |
| Catherine Marshall      | Melita McKinnon     |
| Catherine Stoddart      | Mikaela Mobsby      |
| Charles Pain            | Molly Shorthouse    |
| Cheryl Ross             | Monica Ostigh       |
| Christine Connors       | Nicole Allard       |
| David Boettiger         | Nicole Romero       |

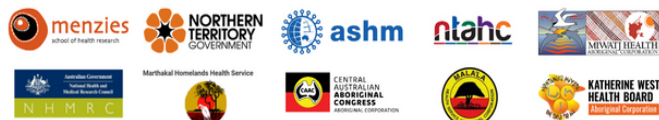

# Hep B PAST

Partnership Approach to  
Sustainably eliminating  
chronic hepatitis B in the  
Northern Territory

|                            |                              |
|----------------------------|------------------------------|
| David McGuinness           | Paula Binks                  |
| David Reeve                | Penny Ramsey                 |
| Deb Gent                   | Peter Nihill                 |
| Dee Hampton                | Phillip Merrdi Wilson        |
| Eddie Mulholland           | Phoebe Schroder              |
| Ella Meumann               | Prashanti Manchikanti        |
| Emily Vintour-Cesar        | Rebecca Katiforis            |
| Emma Childs                | Richard Sullivan             |
| Genevieve Dally            | Robert Batey                 |
| Geoffrey Stewart           | Roisin Steward               |
| George Garambaka Gurruwiwi | Roslyn Dhurrkay              |
| Hayden Jose                | Sami Stewart                 |
| Helen Goodwin              | Sandra Nelson                |
| Hillary Bloomfield         | Sarah Mariyalawuy Bukulatjpi |
| Hugh Heggie                | Sean Heffernan               |
| Isabelle Purcell           | Sean Taylor                  |
| Jaclyn Tate-Baker          | Shiraline Wurrawilya         |
| Jane Davies                | Sinon Cooney                 |
| Jessica Michaels           | Sonja Hill                   |
| John Boffa                 | Stephen Locarnini            |
| Joshua Davis               | Steven Skov                  |
| Jyoti Jadeja               | Steven Tong                  |
| Karen Fuller               | Su Govindasamy               |
| Katherine McNamara         | Sudharsan Venkatesan         |
| Katie McGuire              | Tammy-Allyn Fernandes        |
| Keith Forrest              | Tanya Plavins                |
| Kelly Banz                 | Teresa De Santis             |
| Kelly Hosking              | Teresa Ngurruwuthun          |
| Kelly-Anne Stuart-Carter   | Tiana Alley                  |
| Kerrie Jordan              | Timothy Nabegeyo             |
| Khim Tan                   | Vanessa Towell               |
| Leanne O'Connor            | Vicki Krause                 |
| Wendy Page                 | Megan Howitt                 |
